# Supplementary material for: Research progress of asymptomatic bacteriuria before arthroplasty: A systematic review
Source: PubMed Central journal article supplement (PMC5839824; doi:10.1097/md.0000000000009810), 2018-02-16
Supplement: medi-97-e9810-s001.pdf [file medi-97-e9810-s001.pdf]

Supplemental Digital Content. Studies excluded in the first round of screening

| Author                             | Publication year | Article type   | Reasons for exclusion                                                                                                         |
|------------------------------------|------------------|----------------|-------------------------------------------------------------------------------------------------------------------------------|
| Sendi et al <sup>[1]</sup>         | 2017             | review         | full-text article excluded; non-original study (review)                                                                       |
| Mayne et al <sup>[2]</sup>         | 2016             | review         | full-text article excluded; non-original study (review)                                                                       |
| Dull et al <sup>[3]</sup>          | 2016             | review         | full-text article excluded; non-original study (review)                                                                       |
| Cai et al <sup>[4]</sup>           | 2015             | review         | full-text article excluded; non-original study (review)                                                                       |
| Gomez et al <sup>[5]</sup>         | 2015             | review         | full-text article excluded; non-original study (review)                                                                       |
| Simpson et al <sup>[6]</sup>       | 2015             | review         | full-text article excluded; non-original study (review)                                                                       |
| Duncan et al <sup>[7]</sup>        | 2014             | review         | full-text article excluded; non-original study (review)                                                                       |
| Uçkay et al <sup>[8]</sup>         | 2014             | review         | full-text article excluded; non-original study (review)                                                                       |
| Otermin et al <sup>[9]</sup>       | 2009             | review         | full-text article excluded; non-original study (review)                                                                       |
| Koulouvaris et al <sup>[10]</sup>  | 2009             | original study | full-text article excluded; unrelated study not aiming at asymptomatic bacteriuria                                            |
| Jahoda et al <sup>[11]</sup>       | 2008             | original study | full-text article excluded; unrelated study not aiming at asymptomatic bacteriuria                                            |
| Rajamanickam et al <sup>[12]</sup> | 2007             | review         | full-text article excluded; non-original study (review)                                                                       |
| Kumar et al <sup>[13]</sup>        | 2006             | original study | excluded by evaluating title and abstract; unrelated study investigating indwelling catheterization                           |
| Phillips et al <sup>[14]</sup>     | 2006             | original study | full-text article excluded; unrelated study not aiming at asymptomatic bacteriuria                                            |
| Nicolle et al <sup>[15]</sup>      | 2003             | review         | full-text article excluded; unrelated study not aiming at asymptomatic bacteriuria                                            |
| Saleh et al <sup>[16]</sup>        | 2002             | original study | full-text article excluded; unrelated study not aiming at asymptomatic bacteriuria                                            |
| David et al <sup>[17]</sup>        | 2000             | review         | full-text article excluded; non-original study (review)                                                                       |
| Wymenga et al <sup>[18]</sup>      | 1992             | original study | full-text article excluded; non-original study (review)                                                                       |
| Ainscow et al <sup>[19]</sup>      | 1984             | original study | excluded by evaluating title and abstract; unrelated study investigating hematogenous seeding of infection after arthroplasty |
| Donovan et al <sup>[20]</sup>      | 1976             | original study | full-text article excluded; unrelated study not aiming at asymptomatic bacteriuria                                            |

## References

- [1] Sendi P, Borens O, Wahl P, Clauss M, Uckay I. Management of Asymptomatic Bacteriuria, Urinary Catheters and Symptomatic Urinary Tract Infections in Patients Undergoing Surgery for Joint Replacement: A Position Paper of the Expert Group 'Infection' of swissorthopaedics. *J Bone Jt Infect.* 2017;2(3):154-159.
- [2] Mayne AI, Davies PS, Simpson JM. Screening for asymptomatic bacteriuria before total joint arthroplasty. *BMJ.* 2016;354:i3569.
- [3] Dull R, Crowley K, Frerichs C, Pham K, Cord A. Antimicrobial treatment of preoperative asymptomatic bacteriuria prior to orthopedic arthroplasty and postoperative infectious complications: A systematic review. *Pharmacotherapy.* 2016;36(12):e299-e300.
- [4] Cai T, Mazzoli S, Lanzafame P, Caciagli P, Malossini G, Nesi G, et al. Asymptomatic bacteriuria in clinical urological practice: preoperative control of bacteriuria and management of recurrent UTI. *Pathogens.* 2015;5(1):1-6.
- [5] Gomez MM, Parvizi J. Periprosthetic joint infection in total knee arthroplasty: Current concepts. *Current Orthopaedic Practice.* 2015;26(3):247-251.
- [6] Simpson AHRW, Dave J, Ghert M. Prophylactic antibiotics in total joint arthroplasty: Evolution or devolution? *Bone and Joint Research.* 2015;4(12):195-197.
- [7] Duncan RA. Prosthetic joint replacement: should orthopedists check urine because it's there? *Clin Infect Dis.* 2014;59(1):48-50.
- [8] Uçkay I, Lübbeke A, Huttner B. Preoperative asymptomatic bacteriuria and subsequent prosthetic joint infection: Lack of a causal relation. *Clinical Infectious Diseases.* 2014;59(10):1506-1507.
- [9] Otermin I, Rivero M, Hidalgo A. [Is it necessary to delay or to put off surgery in the case of possible asymptomatic bacteriuria and orthopaedic surgery with implants?]. *Enferm Infecc Microbiol Clin.* 2009;27(4):252-3.
- [10] Koulouvaris P, Sculco P, Finerty E, Sculco T, Sharrock NE. Relationship between perioperative urinary tract infection and deep infection after joint arthroplasty. *Clin Orthop Relat Res.* 2009;467(7):1859-67.

Zhang QY et al. Research progress of asymptomatic bacteriuria before arthroplasty: a systematic review.

- [11] Jahoda D, Nyc O, Simsa J, Kucera E, Hanek P, Chrz P, et al. [Late hematogenous infection of prosthetic joint]. *Acta Chir Orthop Traumatol Cech.* 2008;75(2):88-92.
- [12] Rajamanickam A, Noor S, Usmani A. Should an Asymptomatic Patient with an Abnormal Urinalysis (Bacteriuria Or Pyuria) be Treated with Antibiotics Prior to Major Joint Replacement Surgery?. *Cleve Clin J Med.* 2007; 74 Suppl: S17-S18.
- [13] Kumar P, Mannan K, Chowdhury AM, Kong KC, Pati J. Urinary retention and the role of indwelling catheterization following total knee arthroplasty. *Int Braz J Urol.* 2006;32(1):31-4.
- [14] Phillips JE, Crane TP, Noy M, Elliott TS, Grimer RJ. The incidence of deep prosthetic infections in a specialist orthopaedic hospital: a 15-year prospective survey. *J Bone Joint Surg Br.* 2006;88(7):943-8.
- [15] Nicolle LE. Asymptomatic bacteriuria: when to screen and when to treat. *Infect Dis Clin North Am.* 2003;17(2):367-94.
- [16] Saleh K, Olson M, Resig S, Bershinsky B, Kuskowski M, Gioe T, et al. Predictors of wound infection in hip and knee joint replacement: results from a 20 year surveillance program. *J Orthop Res.* 2002;20(3):506-15.
- [17] David TS, Vrahas MS. Perioperative lower urinary tract infections and deep sepsis in patients undergoing total joint arthroplasty. *J Am Acad Orthop Surg.* 2000;8(1):66-74.
- [18] Wymenga AB, van Horn JR, Theeuwes A, Muijtjens HL, Slooff TJ. Perioperative factors associated with septic arthritis after arthroplasty. Prospective multicenter study of 362 knee and 2,651 hip operations. *Acta Orthop Scand.* 1992;63(6):665-71.
- [19] Ainscow DA, Denham RA. The risk of haematogenous infection in total joint replacements. *J Bone Joint Surg Br.* 1984;66(4):580-2.
- [20] Donovan TL, Gordon RO, Nagel DA. Urinary infections in total hip arthroplasty. Influences of prophylactic cephalosporins and catheterization. *J Bone Joint Surg Am.* 1976;58(8):1134-7.
